# Supplementary material for: Short- and Long-Term Social Recognition Memory Are Differentially Modulated by Neuronal Histamine
Source: PubMed Central journal article supplement (PMC8069616; doi:10.3390/biom11040555), 2021-04-09
Supplement: biomolecules-11-00555-s001.pdf [file biomolecules-11-00555-s001.pdf]

**Supplementary Material related to the manuscript:**

**Short- and long-term social recognition memory are differentially modulated by neuronal histamine**

**Barbara Rani, Bruna Silva-Marques, Rob Leus, Maria Beatrice Passani, Patrizio Blandina and Gustavo Provensi**

This PDF file includes:

Table S1: Critical values obtained in the statistical analysis of the raw data regarding the time spent exploring the cups during the training session (Table 1)

Table S2: Critical values obtained from the statistical analysis of the raw data regarding the Sociability index (Table 1)

Table S3: Critical values obtained in the statistical analysis of the raw data regarding the time spent exploring the cups containing the social stimuli in the retention test session (Figures 1-7)

Table S4: Critical values obtained from the statistical analysis of the raw data regarding the Discrimination index (Figures 1-7)

Table S1: Critical values obtained in the statistical analysis of the raw data regarding the time spent exploring the cups during the training session (Table 1)

| Figure    | n    | Analysis (post hoc reported in Table 1) | Factors Analyzed                                                                                 |             | F ratios               | P values   |
|-----------|------|-----------------------------------------|--------------------------------------------------------------------------------------------------|-------------|------------------------|------------|
| <b>1B</b> | 6    | two-way ANOVA (Bonferroni)              | Genotype ( <i>Hdc<sup>+/+</sup></i> vs <i>Hdc<sup>-/-</sup></i> )<br>Cups (Non social vs Social) | Interaction | F (1, 20) = 0,4975     | P = 0,4887 |
|           |      |                                         |                                                                                                  | Genotype    | F (1, 20) = 2,088e-014 | P > 0,9999 |
|           |      |                                         |                                                                                                  | Cups        | F (1, 20) = 89,18      | P < 0,0001 |
| <b>1C</b> | 6-7  | two-way ANOVA (Bonferroni)              | Genotype ( <i>Hdc<sup>+/+</sup></i> vs <i>Hdc<sup>-/-</sup></i> )<br>Cups (Non social vs Social) | Interaction | F (1, 22) = 2,964      | P = 0,0992 |
|           |      |                                         |                                                                                                  | Genotype    | F (1, 22) = 4,493e-013 | P > 0,9999 |
|           |      |                                         |                                                                                                  | Cups        | F (1, 22) = 365,1      | P < 0,0001 |
| <b>2B</b> | 8-10 | two-way ANOVA (Bonferroni)              | Treatments ( $\alpha$ -FMH vs Vehicle)<br>Cups (Non social vs Social)                            | Interaction | F (1, 32) = 3,234      | P = 0,0816 |
|           |      |                                         |                                                                                                  | Treatments  | F (1, 32) = 0,0        | P > 0,9999 |
|           |      |                                         |                                                                                                  | Cups        | F (1, 32) = 199,9      | P < 0,0001 |
| <b>2C</b> | 7-9  | two-way ANOVA (Bonferroni)              | Treatments ( $\alpha$ -FMH vs Vehicle)<br>Cups (Non social vs Social)                            | Interaction | F (1, 28) = 10,79      | P < 0,01   |
|           |      |                                         |                                                                                                  | Treatments  | F (1, 28) = 1,484e-014 | P > 0,9999 |
|           |      |                                         |                                                                                                  | Cups        | F (1, 28) = 267,3      | P < 0,0001 |
| <b>3B</b> | 8-10 | two-way ANOVA (Bonferroni)              | Treatments (VUF16839 vs Vehicle)<br>Cups (Non social vs Social)                                  | Interaction | F (1, 32) = 7,617      | P < 0,01   |
|           |      |                                         |                                                                                                  | Treatments  | F (1, 32) = 0,0        | P > 0,9999 |
|           |      |                                         |                                                                                                  | Cups        | F (1, 32) = 180,4      | P < 0,0001 |
| <b>3C</b> | 7-9  | two-way ANOVA (Bonferroni)              | Treatments (VUF16839 vs Vehicle)<br>Cups (Non social vs Social)                                  | Interaction | F (1, 28) = 2,965      | P = 0,0961 |
|           |      |                                         |                                                                                                  | Treatments  | F (1, 28) = 8,807e-014 | P > 0,9999 |
|           |      |                                         |                                                                                                  | Cups        | F (1, 28) = 100,0      | P < 0,0001 |
| <b>4B</b> | 7-10 | two-way ANOVA (Bonferroni)              | Treatments (VUF16839 vs Vehicle)<br>Cups (Non social vs Social)                                  | Interaction | F (1, 30) = 5,947      | P < 0,05   |
|           |      |                                         |                                                                                                  | Treatments  | F (1, 30) = 1,690e-013 | P > 0,9999 |
|           |      |                                         |                                                                                                  | Cups        | F (1, 30) = 196,1      | P < 0,0001 |
| <b>4C</b> | 6-8  | two-way ANOVA (Bonferroni)              | Treatments (VUF16839 vs Vehicle)<br>Cups (Non social vs Social)                                  | Interaction | F (1, 26) = 5,024      | P < 0,05   |
|           |      |                                         |                                                                                                  | Treatments  | F (1, 26) = 3,676e-013 | P > 0,9999 |
|           |      |                                         |                                                                                                  | Cups        | F (1, 26) = 183,0      | P < 0,0001 |
| <b>5B</b> | 8-10 | two-way ANOVA (Bonferroni)              | Treatments (VUF16839 vs Vehicle)<br>Cups (Non social vs Social)                                  | Interaction | F (1, 32) = 1,192      | P = 0,2830 |
|           |      |                                         |                                                                                                  | Genotype    | F (1, 32) = 6,855e-014 | P > 0,9999 |
|           |      |                                         |                                                                                                  | Cups        | F (1, 32) = 212,8      | P < 0,0001 |
| <b>5C</b> | 10   | two-way ANOVA (Bonferroni)              | Treatments (VUF16839 vs Vehicle)<br>Cups (Non social vs Social)                                  | Interaction | F (1, 36) = 0,9587     | P = 0,3340 |
|           |      |                                         |                                                                                                  | Genotype    | F (1, 36) = 0,0        | P > 0,9999 |
|           |      |                                         |                                                                                                  | Cups        | F (1, 36) = 110,0      | P < 0,0001 |

|           |          |                               |                                                                                                                                                                 |             |                         |            |
|-----------|----------|-------------------------------|-----------------------------------------------------------------------------------------------------------------------------------------------------------------|-------------|-------------------------|------------|
| <b>6B</b> | 10       | two-way ANOVA<br>(Bonferroni) | Treatments<br>(Donepezil+Vuf16839 <i>vs</i><br>Vehicle+VUF16839)<br>Cups (Non social <i>vs</i> Social)                                                          | Interaction | F (1, 36) = 8,891       | P < 0,01   |
|           |          |                               |                                                                                                                                                                 | Genotype    | F (1, 36) = 9,346e-015  | P > 0,9999 |
|           |          |                               |                                                                                                                                                                 | Cups        | F (1, 36) = 131,5       | P < 0,0001 |
| <b>7B</b> | 7-<br>10 | two-way ANOVA<br>(Bonferroni) | Genotype ( <i>Hdc<sup>+/+</sup></i> <i>vs</i> <i>Hdc<sup>-/-</sup></i> )<br>/Treatments (Ciproxifan <i>vs</i><br>Vehicle)<br>Cups (Non social <i>vs</i> Social) | Interaction | F (3, 58) = 6,379       | P < 0,001  |
|           |          |                               |                                                                                                                                                                 | Groups      | F (3, 58) = -1,461e-013 | P > 0,9999 |
|           |          |                               |                                                                                                                                                                 | Cups        | F (1, 58) = 714,3       | P < 0,0001 |
| <b>7C</b> | 6-8      | two-way ANOVA<br>(Bonferroni) | Injection ( $\alpha$ -FMH <i>vs</i> Vehicle)<br>/Treatments (Ciproxifan <i>vs</i><br>Vehicle)<br>Cups (Non social <i>vs</i> Social)                             | Interaction | F (3, 44) = 1,498       | P = 0,2282 |
|           |          |                               |                                                                                                                                                                 | Groups      | F (3, 44) = 3,535e-014  | P > 0,9999 |
|           |          |                               |                                                                                                                                                                 | Cups        | F (1, 44) = 238,5       | P < 0,0001 |

Table S2: Critical values obtained from the statistical analysis of the raw data regarding the Sociability index (Table 1)

| Figure    | "n"  | Analysis (post hoc<br>reported in table 1) | t                  | P values   |
|-----------|------|--------------------------------------------|--------------------|------------|
| <b>1B</b> | 6    | t-Test                                     | 0.4988             | P = 0,6287 |
| <b>1C</b> | 6-7  | t-Test                                     | 1.237              | P = 0,2417 |
| <b>2B</b> | 8-10 | t-Test                                     | 1.286              | P = 0,2166 |
| <b>2C</b> | 7-9  | t-Test                                     | 1.371              | P = 0,1920 |
| <b>3B</b> | 8-10 | t-Test                                     | 2.002              | P = 0,0625 |
| <b>3C</b> | 7-9  | t-Test                                     | 1.195              | P = 0,2520 |
| <b>4B</b> | 7-10 | t-Test                                     | 1.724              | P = 0,1052 |
| <b>4C</b> | 6-8  | t-Test                                     | 1.593              | P = 0,1352 |
| <b>5B</b> | 8-10 | t-Test                                     | 0.7684             | P = 0,4535 |
| <b>5C</b> | 10   | t-Test                                     | 0.6774             | P = 0,5068 |
| <b>6B</b> | 10   | t-Test                                     | 1.883              | P = 0,0759 |
| <b>7B</b> | 7-10 | One-way ANOVA<br>(Bonferroni)              | F (3, 29) = 2,574  | P = 0,0732 |
| <b>7C</b> | 6-8  | One-way ANOVA<br>(Bonferroni)              | F (3, 22) = 0,7486 | P = 0,5348 |

Table S3: Critical values obtained in the statistical analysis of the raw data regarding the time spent exploring the cups containing the social stimuli in the retention test session (Figures 1-7)

| Figure    | n    | Analysis (post hoc reported in figures) | Factors Analyzed                                                                                 | F ratios    | P values                           |
|-----------|------|-----------------------------------------|--------------------------------------------------------------------------------------------------|-------------|------------------------------------|
| <b>1B</b> | 6    | two-way ANOVA (Bonferroni)              | Genotype ( <i>Hdc<sup>+/+</sup></i> vs <i>Hdc<sup>-/-</sup></i> )<br>Stimuli (Familiar vs Novel) | Interaction | F (1, 20) = 0,5395 P = 0,4712      |
|           |      |                                         |                                                                                                  | Genotype    | F (1, 20) = 4,035e-014 P > 0,9999  |
|           |      |                                         |                                                                                                  | Stimuli     | F (1, 20) = 33,16 P < 0,0001       |
| <b>1C</b> | 6-7  | two-way ANOVA (Bonferroni)              | Genotype ( <i>Hdc<sup>+/+</sup></i> vs <i>Hdc<sup>-/-</sup></i> )<br>Stimuli (Familiar vs Novel) | Interaction | F (1, 22) = 12,18 P = 0,0021       |
|           |      |                                         |                                                                                                  | Genotype    | F (1, 22) = -6,488e-015 P > 0,9999 |
|           |      |                                         |                                                                                                  | Stimuli     | F (1, 22) = 6,335 P < 0,01         |
| <b>2B</b> | 8-10 | two-way ANOVA (Bonferroni)              | Treatments ( $\alpha$ -FMH vs Vehicle)<br>Stimuli (Familiar vs Novel)                            | Interaction | F (1, 32) = 0,4536 P = 0,5055      |
|           |      |                                         |                                                                                                  | Treatments  | F (1, 32) = 1,348e-014 P > 0,9999  |
|           |      |                                         |                                                                                                  | Cups        | F (1, 32) = 29,43 P < 0,0001       |
| <b>2C</b> | 7-9  | two-way ANOVA (Bonferroni)              | Treatments ( $\alpha$ -FMH vs Vehicle)<br>Stimuli (Familiar vs Novel)                            | Interaction | F (1, 28) = 19,88 P = 0,0001       |
|           |      |                                         |                                                                                                  | Treatments  | F (1, 28) = 9,711e-014 P > 0,9999  |
|           |      |                                         |                                                                                                  | Stimuli     | F (1, 28) = 14,17 P < 0,001        |
| <b>3B</b> | 8-10 | two-way ANOVA (Bonferroni)              | Treatments (VUF16839 vs Vehicle)<br>Stimuli (Familiar vs Novel)                                  | Interaction | F (1, 32) = 12,42 P < 0,01         |
|           |      |                                         |                                                                                                  | Treatments  | F (1, 32) = 0,0 P > 0,9999         |
|           |      |                                         |                                                                                                  | Stimuli     | F (1, 32) = 3,630 P = 0,0658       |
| <b>3C</b> | 7-9  | two-way ANOVA (Bonferroni)              | Treatments (VUF16839 vs Vehicle)<br>Stimuli (Familiar vs Novel)                                  | Interaction | F (1, 28) = 19,33 P < 0,001        |
|           |      |                                         |                                                                                                  | Treatments  | F (1, 28) = 0,1120 P = 0,7404      |
|           |      |                                         |                                                                                                  | Stimuli     | F (1, 28) = 18,60 P < 0,001        |
| <b>4B</b> | 7-10 | two-way ANOVA (Bonferroni)              | Treatments (VUF16839 vs Vehicle)<br>Stimuli (Familiar vs Novel)                                  | Interaction | F (1, 30) = 9,508 P < 0,01         |
|           |      |                                         |                                                                                                  | Treatments  | F (1, 30) = -4,259e-014 P > 0,9999 |
|           |      |                                         |                                                                                                  | Stimuli     | F (1, 30) = 7,725 P < 0,01         |
| <b>4C</b> | 6-8  | two-way ANOVA (Bonferroni)              | Treatments (VUF16839 vs Vehicle)<br>Stimuli (Familiar vs Novel)                                  | Interaction | F (1, 26) = 61,25 P < 0,0001       |
|           |      |                                         |                                                                                                  | Treatments  | F (1, 26) = 1,104e-013 P > 0,9999  |
|           |      |                                         |                                                                                                  | Stimuli     | F (1, 26) = 63,62 P < 0,0001       |
| <b>5B</b> | 8-10 | two-way ANOVA (Bonferroni)              | Treatments (VUF16839 vs Vehicle)<br>Stimuli (Familiar vs Novel)                                  | Interaction | F (1, 32) = 13,76 P < 0,001        |
|           |      |                                         |                                                                                                  | Genotype    | F (1, 32) = 8,032e-015 P > 0,9999  |
|           |      |                                         |                                                                                                  | Cups        | F (1, 32) = 6,287 P < 0,05         |
| <b>5C</b> | 10   | two-way ANOVA (Bonferroni)              | Treatments (VUF16839 vs Vehicle)<br>Stimuli (Familiar vs Novel)                                  | Interaction | F (1, 36) = 9,248 P < 0,01         |
|           |      |                                         |                                                                                                  | Genotype    | F (1, 36) = 0,0 P > 0,9999         |
|           |      |                                         |                                                                                                  | Stimuli     | F (1, 36) = 9,405 P < 0,01         |

|           |      |                               |                                                                                                                                                                  |             |                        |            |
|-----------|------|-------------------------------|------------------------------------------------------------------------------------------------------------------------------------------------------------------|-------------|------------------------|------------|
| <b>6B</b> | 10   | two-way ANOVA<br>(Bonferroni) | Treatments (Donepezil+VUF16839<br><i>vs</i> Vehicle+VUF16839)<br>Stimuli (Familiar <i>vs</i> Novel)                                                              | Interaction | F (1, 36) = 23,58      | P < 0,0001 |
|           |      |                               |                                                                                                                                                                  | Genotype    | F (1, 36) = 0,0        | P > 0,9999 |
|           |      |                               |                                                                                                                                                                  | Stimuli     | F (1, 36) = 7,162      | P < 0,05   |
| <b>7B</b> | 7-10 | two-way ANOVA<br>(Bonferroni) | Genotype ( <i>Hdc<sup>+/+</sup></i> <i>vs</i> <i>Hdc<sup>-/-</sup></i> ) +<br>Treatments (Ciproxifan <i>vs</i><br>Vehicle)<br>Stimuli (Familiar <i>vs</i> Novel) | Interaction | F (3, 56) = 10,05      | P < 0,0001 |
|           |      |                               |                                                                                                                                                                  | Groups      | F (3, 56) = 4,784e-014 | P > 0,9999 |
|           |      |                               |                                                                                                                                                                  | Stimuli     | F (1, 56) = 20,66      | P < 0,0001 |
| <b>7C</b> | 6-8  | two-way ANOVA<br>(Bonferroni) | Injection ( $\alpha$ -FMH <i>vs</i> Vehicle) +<br>Treatments (Ciproxifan <i>vs</i><br>Vehicle)<br>Stimuli (Familiar <i>vs</i> Novel)                             | Interaction | F (3, 44) = 25,32      | P < 0,0001 |
|           |      |                               |                                                                                                                                                                  | Groups      | F (3, 44) = 5,769e-014 | P > 0,9999 |
|           |      |                               |                                                                                                                                                                  | Stimuli     | F (1, 44) = 4,571      | P < 0,05   |

Table S4: Critical values obtained from the statistical analysis of the raw data regarding the Discrimination index (Figures 1-7)

| Figure    | n    | Analysis (post hoc<br>reported in figures) | t                 | P values   |
|-----------|------|--------------------------------------------|-------------------|------------|
| <b>1B</b> | 6    | t-Test                                     | 0.6345            | P = 0,5400 |
| <b>1C</b> | 6-7  | t-Test                                     | 2.492             | P < 0,05   |
| <b>2B</b> | 8-10 | t-Test                                     | 0.4786            | P = 0,6387 |
| <b>2C</b> | 7-9  | t-Test                                     | 4.299             | P < 0,001  |
| <b>3B</b> | 8-10 | t-Test                                     | 2.480             | P < 0,05   |
| <b>3C</b> | 7-9  | t-Test                                     | 2.732             | P < 0,05   |
| <b>4B</b> | 7-10 | t-Test                                     | 2.166             | P < 0,05   |
| <b>4C</b> | 6-8  | t-Test                                     | 5.512             | P < 0,001  |
| <b>5B</b> | 8-10 | t-Test                                     | 2.777             | P < 0,001  |
| <b>5C</b> | 10   | t-Test                                     | 2.153             | P < 0,05   |
| <b>6B</b> | 10   | t-Test                                     | 3.454             | P < 0,01   |
| <b>7B</b> | 7-10 | One-way ANOVA<br>(Bonferroni)              | F (3, 29) = 4,438 | P < 0,05   |
| <b>7C</b> | 6-8  | One-way ANOVA<br>(Bonferroni)              | F (3, 22) = 12,82 | P < 0,0001 |
